# Supplementary material for: Melatonin Alleviates Copper Toxicity via Improving ROS Metabolism and Antioxidant Defense Response in Tomato Seedlings
Source: MDPI journal article supplement (doi:10.3390/antiox11040758), 2022-04-11
Supplement: s1 [file s1]

## Supplementary Materials

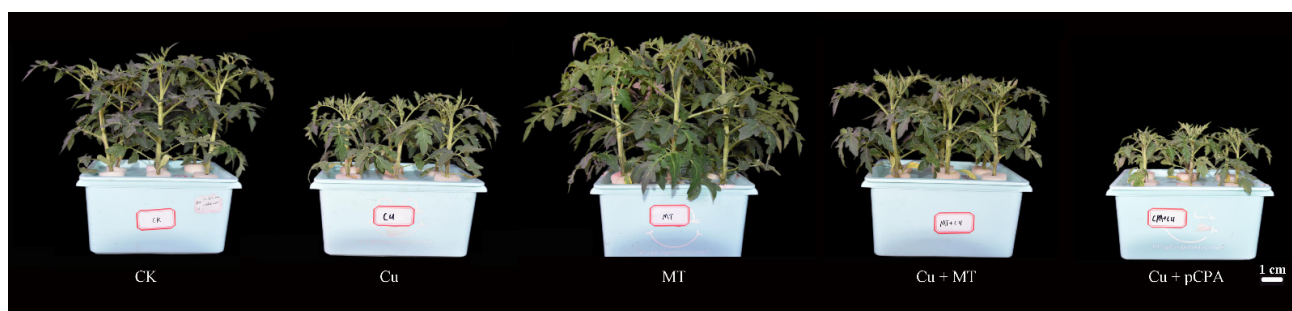

**Figure S1.** Phenotypes after 14 d of  $\text{Cu}^{2+}$  stress and melatonin and pCPA treatment. Cu, culture solution that contained 0.1 mM Cu; MT, culture solution with folia application of 0.1 mM MT; Cu+MT, culture solution containing 0.1 mM Cu with folia application of 0.1 mM MT; Cu+pCPA, culture solution containing 0.1 mM Cu with 0.1 mM MT synthesis inhibitor pCPA.

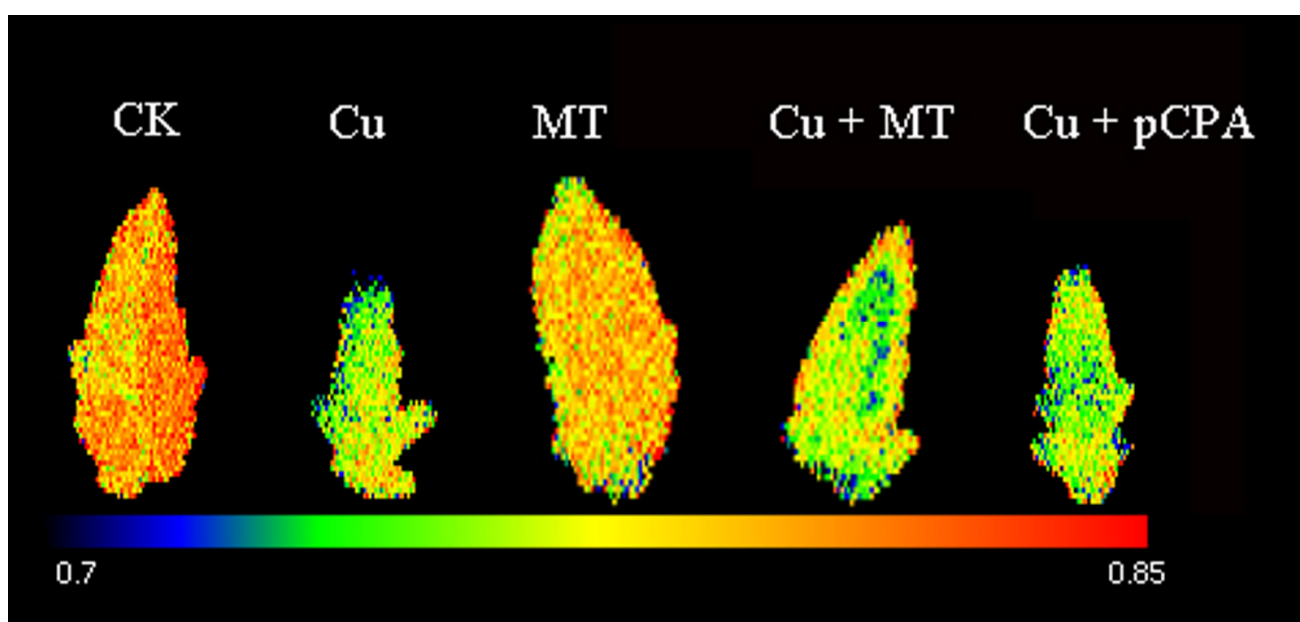

**Figure S2.** Fv/Fm of leaf under different treatment. Cu, culture solution that contained 0.1 mM Cu; MT, ordinary culture solution with folia application of 0.1 mM MT; Cu+MT, culture solution containing 0.1 mM Cu with folia application of 0.1 mM MT; Cu+pCPA, culture solution containing 0.1 mM Cu with 0.1 mM MT synthesis inhibitor pCPA..

**Table S1.** The primer sequences used in qRT-PCR and VIGS vector construction. Superoxide dismutase activity, SOD; catalase, CAT; ascorbate peroxidase, APX; glutathione reductase, GR; monodehydro ascorbate reductase, MDHAR; dehydro ascorbate reductase, DHAR; tryptophan decarboxylase, TDC; tryptamine 5-hydroxylase, T5H; serotonin N-acetyltransferase, SNAT; caffeic acid O-methyltransferase, COMT.

| Gene full name                   | Gene Acronym | Gene Accession No. | Forward Primer                                   | Reverse Primer                               | Comment             |
|----------------------------------|--------------|--------------------|--------------------------------------------------|----------------------------------------------|---------------------|
| Superoxide dismutase             | SOD          | XM_004232522       | ACTACTCCCAGTTGCATC<br>CC                         | CACCAGGAGCAGCCATGATA                         | qRT-PCR             |
| Catalase                         | CAT          | NM_001247898       | GCAGCTCCCAGTTAATG<br>CTC                         | AGCAGGACGACAAGGATCAA                         | qRT-PCR             |
| Ascorbate peroxidase             | APX          | NM_001247859       | GGCACTCTGCTGGTACC<br>TAT                         | GGAGAGAGTGGGAAACTGCT                         | qRT-PCR             |
| Glutathione reductase            | GR           | NM_001247314       | GGAGCCATAGAGGTTGA<br>CGA                         | CTCCTCCCTCCATCAAAGCA                         | qRT-PCR             |
| Monodehydroascorbate reductase   | MDHAR        | NM_001247084       | CGGACAGTTCCGAACAA<br>ACA                         | CCCGTGCAATTCGGTTGTAT                         | qRT-PCR             |
| Dehydroascorbate reductase       | DHAR         | NM_001247893       | GAGGTGAACCCTGAAGG<br>GAA                         | CCCACAGAGGCAAATTCAGG                         | qRT-PCR             |
| Tryptophan decarboxylase         | TDC          | XM_010328040       | CAGTGCCGGGATTAACA<br>TGG                         | GCAAGCCAATCCAGAACGAT                         | qRT-PCR             |
| Tryptamine 5-hydroxylase         | T5H          | NM_001247918       | CTCCGTCTCCACCATCTC<br>TC                         | CGGAATTTGGCCGAGTTGAA                         | qRT-PCR             |
| Serotonin N-acetyltransferase    | SNAT         | XM_004248987       | TAAGGTTGGTTGGCCTC<br>GAA                         | GGCCATGCCTATCAGCTTCT                         | qRT-PCR             |
| Caffeic acid O-methyltransferase | COMT         | XM_004234980       | CCGATCACCACCACCTT<br>ATCC                        | CCACCAACATCAACAATGGA                         | qRT-PCR             |
| Actin                            | Actin        | NM_001321306       | TGTCCCTATTTACGAGG<br>GTTATGC                     | AGTTAAATCAGACCAGCAAG<br>AT                   | qRT-PCR             |
| Caffeic acid O-methyltransferase | COMT1-TRV2   | XM_004234980       | AAGGTTACCGAATTCTC<br>TAGACTCAAACAGAGGA<br>TGAAGC | GAGACGCGTGAGCTCGGTACA<br>TAAAGCCGCTCTACACGTC | Vector construction |
